# Supplementary material
Source: ML conference proceedings conference paper supplement (https://openaccess.thecvf.com/content/CVPR2025/html/Niu_OVO-Bench_How_Far_CVPR_2025_paper.html)
Supplement: Supplementary file 1 [file Niu_OVO-Bench_How_Far_CVPR_2025_supplemental.pdf]

# OVO-Bench: How Far is Your Video-LLMs from Real-World Online Video Understanding?

## Supplementary Material

### 6. More Details of Evaluation

#### 6.1. Evaluation for Online Models on Forward Active Responding

As no existing online models can satisfy the demand imposed by our original designs, we choose not to cover this part in our main paper. We introduce an effective evaluation metric tailored for each task consisting of two different dimensions.

##### Guidance for evaluation metrics design.

- **Accuracy-Based.** The model’s responses should, first of all, be correct without misleading information. We judge the effectiveness of the answer given by the model, and simply average all of them to give the accuracy.
- **Score-Based.** Based on the accuracy-based evaluation, we encourage the response to be both accurate and timely and therefore devise a scoring metric.

**Details of evaluation metrics.** Given the user’s queries  $Q_{t_i}$  at time  $t_i$ , the referred events  $E_j$  (such as a specific step of a tutorial procedure) with the time interval from  $t_j$  to  $t'_j$ , the appropriate response  $A_m$  at time  $t_m$ , the model’s responses  $R_{m'}$  at time  $t'_m$ , the evaluation function  $F(R_{m'}, A_m)$ , which directly compare the models’ responses against the right ones, the evaluation metrics of different models are formally given as follows.

1. **[REC]** In this task, the query is only made at a certain time before one complete repetition event happens. In our benchmark, the query is made at the start of the video, i.e. only  $Q_0$  is made.
  - **Accuracy-Based.**

$$Acc = \frac{\sum_{i=1}^N F(R_{m'}, A_m)}{N}$$

- **Score-Based.**

$$Score = \sum_{i=1}^N e^{i \cdot p_1} \cdot F(R_{m'}, A_m) \cdot 2^{-(m'-m) \cdot p_2}$$

where  $F(R_{m'}, A_m) = [A_m == R_{m'}]$ , which gives 1 if the model’s response is the same as the answer, and gives 0 otherwise.  $p_1$  and  $p_2$  are parameters to balance the weight. In our evaluation, they are set to 0.2 and 0.05 respectively.

2. **[SSR]** In this task, a query like *Illustrate me on how to make a sandwich according to the video* is made before the start of the procedure. Akin to [REC], the query is only made at the start of the video, i.e. only  $Q_0$  is made.

- **Accuracy-Based.**

$$Acc = \frac{\sum_{i=1}^N F(R_{m'}, A_m)}{N}$$

- **Score-Based.**

$$Score = \sum_{i=1}^N F(R_{m'}, A_m) \cdot 2^{-(m'-m) \cdot p}$$

where we leverage GPT-4o to give  $F(R_{m'}, A_m)$ , measuring the effectiveness of  $R_{m'}$  given the reference answer  $A_m$  and relevant visual content.  $p$  is set to 0.5 to balance weight in our evaluation.

3. **[CRR]** In this setting, queries are made before every  $A_m$ , i.e.  $range(i) == range(m)$ .
  - **Accuracy-Based.**

$$Acc = \frac{\sum_{i=1}^N F(R_{m'}, A_m)}{N}$$

- **Score-Based.**

$$Score = \sum_{i=1}^N F(R_{m'}, A_m) \cdot 2^{-(m'-m) \cdot p}$$

where we leverage GPT-4o to give  $F(R_{m'}, A_m)$ , measuring the effectiveness of  $R_{m'}$  given the reference answer  $A_m$  and relevant visual content.  $p$  is set to 0.5 to balance weight in our evaluation.

**Prompt Design.** To adapt to the online scenarios, we constructed streaming mode prompts with accurate timestamps and also deleted the complicated instructional statement compared to 6.2. Prompts and examples of models’ responses are shown in 8.

#### 6.2. Prompt Design for Offline Models on Forward Active Responding

The *Forward Active Responding* task is intrinsically inappropriate for offline models, as these models only support queries about existing video contents and can not receive additional visual frames after the query is made. However, considering the superiority of offline models against existing online models, we design a multiple-triggering evaluation pipeline and prompt offline models to decide whether the current time is appropriate for answering the user’s query. Formally, given the user’s query  $Q_{t_0}$  at  $t_0$ , we leverage offline models to decide at  $t_i, i \geq 1; t_i > t_0$  whether

| 6.1. Online Models on Forward Active Responding<br>Prompt Used & Response Examples                                                                                                                                                                                                                                                                                                                                                                                                                                                                                                                                                                                                                                                                                                                                                                                                                                                                                                                                                                                              |                                                                                                                                                                                                                                                                                                                                                                                                                                                                                                                                                                                                                                                                                                                                                                                                                                                                                                                                                                                                                           |                                                                                                                                                                                                                                                                                                                                                                                                                                                                                                                                                                                                                                                                                                                                                                                                                                                                                                                                                                                                                                                                                                                                                        |
|---------------------------------------------------------------------------------------------------------------------------------------------------------------------------------------------------------------------------------------------------------------------------------------------------------------------------------------------------------------------------------------------------------------------------------------------------------------------------------------------------------------------------------------------------------------------------------------------------------------------------------------------------------------------------------------------------------------------------------------------------------------------------------------------------------------------------------------------------------------------------------------------------------------------------------------------------------------------------------------------------------------------------------------------------------------------------------|---------------------------------------------------------------------------------------------------------------------------------------------------------------------------------------------------------------------------------------------------------------------------------------------------------------------------------------------------------------------------------------------------------------------------------------------------------------------------------------------------------------------------------------------------------------------------------------------------------------------------------------------------------------------------------------------------------------------------------------------------------------------------------------------------------------------------------------------------------------------------------------------------------------------------------------------------------------------------------------------------------------------------|--------------------------------------------------------------------------------------------------------------------------------------------------------------------------------------------------------------------------------------------------------------------------------------------------------------------------------------------------------------------------------------------------------------------------------------------------------------------------------------------------------------------------------------------------------------------------------------------------------------------------------------------------------------------------------------------------------------------------------------------------------------------------------------------------------------------------------------------------------------------------------------------------------------------------------------------------------------------------------------------------------------------------------------------------------------------------------------------------------------------------------------------------------|
| [REC]<br>Repetition Event Count                                                                                                                                                                                                                                                                                                                                                                                                                                                                                                                                                                                                                                                                                                                                                                                                                                                                                                                                                                                                                                                 | [SSR]<br>Sequential Steps Recognition                                                                                                                                                                                                                                                                                                                                                                                                                                                                                                                                                                                                                                                                                                                                                                                                                                                                                                                                                                                     | [CRR]<br>Clues Reveal Responding                                                                                                                                                                                                                                                                                                                                                                                                                                                                                                                                                                                                                                                                                                                                                                                                                                                                                                                                                                                                                                                                                                                       |
| <p><b>[Prompt]</b><br/>In the video, the man/woman is [Action] repetitively. Remind me every time when he/she finishes one.</p> <p><b>[Examples]</b><br/>[Action] Showing something to the camera<br/>[Complete Query] In the video, the man/woman is showing something to the camera repetitively. Remind me every time when he/she finishes one.<br/>[Query Time] 0:00/Start of the video<br/>[GT Times] (0:00-0:07) - (0:09-0:19) - (0:21-0:25) - (0:27-0:34)</p> <p><b>[Response]</b><br/>[videollm-online]<br/>(0:00) You look around.</p>                                                                                                                                                                                                                                                                                                                                                                                                                                                                                                                                 | <p><b>[Prompt]</b><br/>Illustrate me on the steps of [Procedure] according to the video.</p> <p><b>[Examples]</b><br/>[Procedure] Make Sugar Coated Haws<br/>[Complete Query] In the video, the man/woman is showing something to the camera repetitively. Remind me every time when he/she finishes one.<br/>[Query Time] 0:00/Start of the video<br/>[Steps]<br/>- String the fruit together<br/>- Melt the sugar<br/>- Soak sugar gourd in sugar<br/>[GT Times] (0:44-1:07) - (1:22-1:19) - (1:51-2:11)</p> <p><b>[Response]</b><br/>[videollm-online]<br/>(0:00) You hold a haw in your left hand<br/>(0:05) You hold a haw in your left hand<br/>...<br/>(0:49) You hold a haw in your left hand</p>                                                                                                                                                                                                                                                                                                                 | <p><b>[Prompt]</b><br/>[Question]<br/>The woman in the black coat walks towards the direction of the man in yellow, what action does she do with the man?<br/>[Clues Reveal Time] 5:17<br/>[Answer] She walks past him.<br/>[Query Time] 5:10</p> <p><b>[Response]</b><br/>[videollm-online]<br/>(5:10) It seems like the woman in the black coat is walking towards the man in the yellow coat. She is likely to interact with him.</p>                                                                                                                                                                                                                                                                                                                                                                                                                                                                                                                                                                                                                                                                                                               |
| 6.2. Offline Models on Forward Active Responding<br>Prompt Used & Response Examples                                                                                                                                                                                                                                                                                                                                                                                                                                                                                                                                                                                                                                                                                                                                                                                                                                                                                                                                                                                             |                                                                                                                                                                                                                                                                                                                                                                                                                                                                                                                                                                                                                                                                                                                                                                                                                                                                                                                                                                                                                           |                                                                                                                                                                                                                                                                                                                                                                                                                                                                                                                                                                                                                                                                                                                                                                                                                                                                                                                                                                                                                                                                                                                                                        |
| [REC]<br>Repetition Event Count                                                                                                                                                                                                                                                                                                                                                                                                                                                                                                                                                                                                                                                                                                                                                                                                                                                                                                                                                                                                                                                 | [SSR]<br>Sequential Steps Recognition                                                                                                                                                                                                                                                                                                                                                                                                                                                                                                                                                                                                                                                                                                                                                                                                                                                                                                                                                                                     | [CRR]<br>Clues Reveal Responding                                                                                                                                                                                                                                                                                                                                                                                                                                                                                                                                                                                                                                                                                                                                                                                                                                                                                                                                                                                                                                                                                                                       |
| <p><b>[Prompt]</b><br/>You're a helpful assistant proficient in video question-answering. You're watching a video in which people may perform a certain type of action repetitively. The person performing are referred to as 'they' in the following statement. You're task is to count how many times did different people in the video perform this kind of action in total.<br/>Now, answer the following question:<br/>[Question]<br/>Your response type should be INT, for example, 0/1/2/3...</p> <p><b>[Examples]</b><br/>[Question]<br/>How many times did they showing something to the camera?<br/>[Ground Truth] 1 - 2 - 3 - 4<br/>[GT Times] (0:00-0:07) - (0:09-0:19) - (0:21-0:25) - (0:27-0:34)<br/>[Query Times] (0:07) - (0:19) - (0:25) - (0:34)</p> <p><b>[Response]</b><br/>[Gemini-1.5 Pro] 1 - 1 - 1 - 6<br/>[GPT-4o] 0 - 0 - 1 - 3<br/>[Qwen-VL-72B] 1 - 4 - 1 - 4<br/>[Qwen-VL-7B] 1 - 4 - 1 - 4<br/>[LLaVA-NeXT-Video-7B] 2 - 2 - 2 - 2<br/>[LLaVA-OneVision-7B] 2 - 0 - 2 - 1<br/>[LongVU-7B] 3 - 3 - 3 - 3<br/>[Flash-VStream-7B] 2 - 2 - 3 - 3</p> | <p><b>[Prompt]</b><br/>You're a helpful assistant proficient in video question-answering. You're watching a tutorial video which contain a sequential of steps. The following is one step from the whole procedures:<br/>[Query Step]<br/>Your task is to decide: Is the man/woman in the video currently carrying out this step?<br/>Return "Yes" if the man/woman in the video is currently performing this step;<br/>Return "No" if not</p> <p><b>[Examples]</b><br/>[Procedure] Make Sugar Coated Haws<br/>[Query Step] melt the sugar<br/>[Ground Truth] N - N - Y - Y - Y<br/>[Step Intervals] 1:22 - 1:46<br/>[Query Times] (1:17) - (1:20) - (1:24) - (1:27) - (1:46)</p> <p><b>[Response]</b><br/>[Gemini-1.5 Pro] N - N - N - N - Y<br/>[GPT-4o] N - N - N - Y - Y<br/>[Qwen-VL-72B] N - N - N - N - N<br/>[Qwen-VL-7B] N - N - N - N - Y<br/>[LLaVA-NeXT-Video-7B] N - N - N - Y - Y<br/>[LLaVA-OneVision-7B] N - N - N - N - Y<br/>[LongVU-7B] N - N - N - N - Y<br/>[Flash-VStream-7B] Y - N - Y - Y - Y</p> | <p><b>[Prompt]</b><br/>You're a helpful assistant proficient in video question-answering. You're responsible of answering questions based on the video content. The following question are relevant to the latest frames, i.e. the end of the video.<br/>[Question]<br/>Decide whether existing visual content, especially latest frames, i.e. frames that near the end of the video, provide enough information for answering the question.<br/>Return "Yes" if existing visual content has provided enough information;<br/>Return "No" otherwise.</p> <p><b>[Examples]</b><br/>[Question]<br/>The woman in the black coat walks towards the direction of the man in yellow, what action does she do with the man?<br/>[Ground Truth] N - N - Y - Y - Y<br/>[Clues Reveal Time] 5:17<br/>[Query Times] (5:10) - (5:13) - (5:19) - (5:27) - (5:47)</p> <p><b>[Response]</b><br/>[Gemini-1.5 Pro] N - N - N - N - N<br/>[GPT-4o] N - N - N - Y - N<br/>[Qwen-VL-72B] N - N - N - N - N<br/>[Qwen-VL-7B] N - N - N - N - N<br/>[LLaVA-NeXT-Video-7B] N - Y - Y - N - Y<br/>[LLaVA-OneVision-7B] Y - Y - Y - Y - Y<br/>[LongVU-7B] N - N - N - Y - N</p> |

Figure 8. Prompts used for Online(up) and Offline(down) Models on *Forward Active Responding* and Response Examples. Despite our vision for online models, existing online models, like videollm-online, are still far from satisfactory, showing limited adaptation ability, and would easily encounter collapse when processing complicated or out-of-training-domain video and queries. Offline models are inclined to perform random guessing when the queries contain words like "is/currently/ongoing".

video contents from  $t_0$  to  $t_i$  offer sufficient clues. Specifically, for each of the tasks under the *Forward Active Responding* setting, instructional prompts and examples of models' [5][56] responses are shown in Fig. 8.

### 6.3. Prompt Design for Models on Backward Tracing and Real-Time Visual Perception

We use the clip from the beginning to the query time to query models. Prompts and examples of models' responses are shown in Fig. 9.

## 7. More Details of Benchmark Construction

### 7.1. Human-annotated QA Generation

We leverage meticulous human labor for part of the QA generation.

**Real-Time Visual Perception.** For tasks, including [STU], [OJR], and [ATR], we invite volunteers to propose candidate questions in supplement to our Video-LLMs-based automatic generation pipeline. This procedure is designed to alleviate possible bias and increase diversity. Specifically, we provide our volunteers with the following guidelines:

- Watch the video and decide whether this candidate is appropriate for constructing questions that can be classified into the above three types.

| 6.3-1 Online Models on Backward Tracing and Real-Time Visual Perception                                                                                                                                                                                                                                                                                                                                                                                                                                                                                                                                                                                                                                                                                                                                      |                                                                                                                                                                                                                                                                                                                                                                                                                                                                                                                                                                                                                                                                                                                                                                                                           |                                                                                                                                                                                                                                                                                                                                                                                                                                                                                                                                                                                                                                                                                                                                                                  |
|--------------------------------------------------------------------------------------------------------------------------------------------------------------------------------------------------------------------------------------------------------------------------------------------------------------------------------------------------------------------------------------------------------------------------------------------------------------------------------------------------------------------------------------------------------------------------------------------------------------------------------------------------------------------------------------------------------------------------------------------------------------------------------------------------------------|-----------------------------------------------------------------------------------------------------------------------------------------------------------------------------------------------------------------------------------------------------------------------------------------------------------------------------------------------------------------------------------------------------------------------------------------------------------------------------------------------------------------------------------------------------------------------------------------------------------------------------------------------------------------------------------------------------------------------------------------------------------------------------------------------------------|------------------------------------------------------------------------------------------------------------------------------------------------------------------------------------------------------------------------------------------------------------------------------------------------------------------------------------------------------------------------------------------------------------------------------------------------------------------------------------------------------------------------------------------------------------------------------------------------------------------------------------------------------------------------------------------------------------------------------------------------------------------|
| Prompt Used & Response Examples                                                                                                                                                                                                                                                                                                                                                                                                                                                                                                                                                                                                                                                                                                                                                                              |                                                                                                                                                                                                                                                                                                                                                                                                                                                                                                                                                                                                                                                                                                                                                                                                           |                                                                                                                                                                                                                                                                                                                                                                                                                                                                                                                                                                                                                                                                                                                                                                  |
| [ACR]<br>Action Recognition                                                                                                                                                                                                                                                                                                                                                                                                                                                                                                                                                                                                                                                                                                                                                                                  | [OCR]<br>Optical Character Recognition                                                                                                                                                                                                                                                                                                                                                                                                                                                                                                                                                                                                                                                                                                                                                                    | [ASI]<br>Action Sequence Identification                                                                                                                                                                                                                                                                                                                                                                                                                                                                                                                                                                                                                                                                                                                          |
| <b>[Prompt]</b><br>Question: [Question]<br>Options:<br><b>[Options]</b><br>Answer with the option's letter from the given choices directly.<br><br><b>[Examples]</b><br><b>[Question]</b> What is he doing?<br><b>[Prompt]</b> Question: What is he doing?<br>Options:<br>A: He is wiping something with a rag.<br>B: He is hitting objects with a tool.<br>C: He is inspecting an object closely.<br>D: He is connecting the pipe to the interface.<br>Answer with the option's letter from the given choices directly.<br><b>[Query Time]</b> 4:47<br><b>[GT]</b> B(Time 3:21)->D(Time 1:43)->A(Time 4:47)<br><br><b>[Response]</b><br>[videollm-online]<br>(4:47) You are inspecting the object closely.                                                                                                  | <b>[Prompt]</b><br>Question: [Question]<br>Options:<br><b>[Options]</b><br>Answer with the option's letter from the given choices directly.<br><br><b>[Examples]</b><br><b>[Question]</b> What name and number are visible on the back of this person's jacket?<br><b>[Prompt]</b> Question: What name and number are visible on the back of this person's jacket?<br>Options:<br>A: LAFFONT, 00.<br>B: TOM, 21.<br>C: MOTEEA, 18.<br>D: GUS, 83.<br>Answer with the option's letter from the given choices directly.<br><b>[Query Time]</b> 7:46<br><b>[GT]</b> D(Time 1:43)->C(Time 5:09)->A(Time 7:46)<br><br><b>[Response]</b><br>[videollm-online]<br>(7:46) According to the information provided, the name and number on the back of the person's jacket are "LAFFONT, 00".                        | <b>[Prompt]</b><br>Question: [Question]<br>Options:<br><b>[Options]</b><br>Answer with the option's letter from the given choices directly.<br><br><b>[Examples]</b><br><b>[Question]</b> Where did I put the shoe?<br><b>[Prompt]</b> Question: Where did I put the shoe?<br>Options:<br>A: Under the table.<br>B: On the shelf.<br>C: Shoes organizer at the back of the door.<br>D: Unable to answer.<br>Answer with the option's letter from the given choices directly.<br><b>[Query Time]</b> 7:00<br><b>[GT]</b> D(Time 7:00)<br><b>[Clues Time]</b> 8:00<br><br><b>[Response]</b><br>[videollm-online]<br>(7:00) You put the shoe on the shelf.                                                                                                          |
| 6.3-2 Offline Models on Backward Tracing and Real-Time Visual Perception                                                                                                                                                                                                                                                                                                                                                                                                                                                                                                                                                                                                                                                                                                                                     |                                                                                                                                                                                                                                                                                                                                                                                                                                                                                                                                                                                                                                                                                                                                                                                                           |                                                                                                                                                                                                                                                                                                                                                                                                                                                                                                                                                                                                                                                                                                                                                                  |
| Prompt Used & Response Examples                                                                                                                                                                                                                                                                                                                                                                                                                                                                                                                                                                                                                                                                                                                                                                              |                                                                                                                                                                                                                                                                                                                                                                                                                                                                                                                                                                                                                                                                                                                                                                                                           |                                                                                                                                                                                                                                                                                                                                                                                                                                                                                                                                                                                                                                                                                                                                                                  |
| [ACR]<br>Action Recognition                                                                                                                                                                                                                                                                                                                                                                                                                                                                                                                                                                                                                                                                                                                                                                                  | [OCR]<br>Optical Character Recognition                                                                                                                                                                                                                                                                                                                                                                                                                                                                                                                                                                                                                                                                                                                                                                    | [ASI]<br>Action Sequence Identification                                                                                                                                                                                                                                                                                                                                                                                                                                                                                                                                                                                                                                                                                                                          |
| <b>[Prompt]</b><br>Question: [Question]<br>Options:<br><b>[Options]</b><br>Answer with the option's letter from the given choices directly.<br><br><b>[Examples]</b><br><b>[Question]</b> What is he doing?<br><b>[Prompt]</b> Question: What is he doing?<br>Options:<br>A: He is wiping something with a rag.<br>B: He is hitting objects with a tool.<br>C: He is inspecting an object closely.<br>D: He is connecting the pipe to the interface.<br>Answer with the option's letter from the given choices directly.<br><b>[Query Time]</b> 4:47<br><b>[GT]</b> B(Time 3:21)->D(Time 1:43)->A(Time 4:47)<br><br><b>[Response]</b><br>[Gemini-1.5 Pro] A<br>[GPT-4o] A<br>[Qwen-VL-72B] D<br>[Qwen-VL-7B] B<br>[LLaVA-NeXT-Video-7B] D<br>[LLaVA-OneVision-7B] D<br>[LongVU-7B] A<br>[Flash-VStream-7B] D | <b>[Prompt]</b><br>Question: [Question]<br>Options:<br><b>[Options]</b><br>Answer with the option's letter from the given choices directly.<br><br><b>[Examples]</b><br><b>[Question]</b> What name and number are visible on the back of this person's jacket?<br><b>[Prompt]</b> Question: What name and number are visible on the back of this person's jacket?<br>Options:<br>A: LAFFONT, 00.<br>B: TOM, 21.<br>C: MOTEEA, 18.<br>D: GUS, 83.<br>Answer with the option's letter from the given choices directly.<br><b>[Query Time]</b> 7:46<br><b>[GT]</b> D(Time 1:43)->C(Time 5:09)->A(Time 7:46)<br><br><b>[Response]</b><br>[Gemini-1.5 Pro] A<br>[GPT-4o] A<br>[Qwen-VL-72B] A<br>[Qwen-VL-7B] C<br>[LLaVA-NeXT-Video-7B] A<br>[LLaVA-OneVision-7B] C<br>[LongVU-7B] A<br>[Flash-VStream-7B] B | <b>[Prompt]</b><br>Question: [Question]<br>Options:<br><b>[Options]</b><br>Answer with the option's letter from the given choices directly.<br><br><b>[Examples]</b><br><b>[Question]</b> Where did I put the shoe?<br><b>[Prompt]</b> Question: Where did I put the shoe?<br>Options:<br>A: Under the table.<br>B: On the shelf.<br>C: Shoes organizer at the back of the door.<br>D: Unable to answer.<br>Answer with the option's letter from the given choices directly.<br><b>[Query Time]</b> 7:00<br><b>[GT]</b> D(Time 7:00)<br><b>[Clues Time]</b> 8:00<br><br><b>[Response]</b><br>[Gemini-1.5 Pro] D<br>[GPT-4o] D<br>[Qwen-VL-72B] D<br>[Qwen-VL-7B] D<br>[LLaVA-NeXT-Video-7B] A<br>[LLaVA-OneVision-7B] C<br>[LongVU-7B] A<br>[Flash-VStream-7B] A |

Figure 9. Prompts used for Online(up) and Offline(down) Models on Real-Time Visual Perception and Response Examples. Three tasks including [ACR], [OCR], and [ASI] are included as demonstrations. Our benchmarks involve a large ratio of questions, whose answers shift over time, which means that models can hardly figure out the answer by randomly selecting frames from original videos.

- Selected appropriate moments for problem construction. Consider whether the moment contains: 1. Obvious spatial relationships between several objects; 2. Interested objects, such as something that appears in the moment, and so on; 3. Objects with unusual attributes, e.g. green fire, smooth woods.
- Construct options for the questions. Ensure that 1. Options should be relevant to the visual content; 2. Incorrect options should bring misleading information from the visual content; 3. Options should be as close in length as possible.

**Clue Reveal Responding.** For our novel [CRR] task, we find it difficult to construct satisfactory question proposals by straightly prompting Video-LLMs with original video content as reference or LLMs with the provided scripts and subtitles as reference. So we recruit volunteers to propose

queries and corresponding answers. Our guidelines for volunteers are as follows:

- Find scenes with apparent discontinuity. For example, character A performs a certain action at query time  $Q_i$ . However, the action's complete process or outcome is not immediately shown during query time.
- Continue watching the video, find clues for your query, and annotate the clues revealing time as  $A_i$ .
- Try to provide concise timestamps, let  $A_i$  be the time when enough visual information has just been revealed.

## 8. Additional Dataset Analysis

### 8.1. Task and Sample Distribution

Fig. 10 illustrates the distribution of questions and videos in OVO-Bench across the twelve tasks listed in Fig. 2.

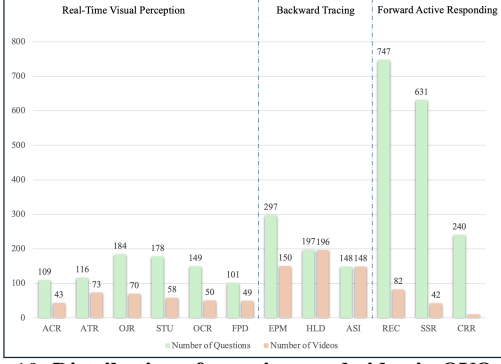

Figure 10. Distribution of questions and video in OVO-Bench.

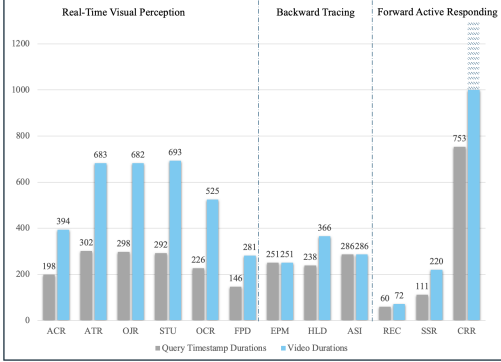

Figure 11. Distribution of averaged query timestamps and video duration (in seconds) in OVO-Bench. Specifically, the averaged video duration in CRR is 6,857 seconds.

## 8.2. Query Timestamps and Video Duration

Fig. 11 illustrates the distribution of averaged query timestamps and video duration in OVO-Bench across the twelve tasks listed in Fig. 2.

## 9. Limitations

While we have tried hard to cover a wide range of reasonable video domains and QA generation methods, the scarcity of existing datasets with annotations that fit requirements, the unsatisfactory results of automatic QA generation, and the high human annotation cost, hinder diversity and can cause potential bias.

**Offline Models for Online Video Understanding.** As implied in our analysis 8, offline models usually perform random guesses in the forward active responding scenarios, making our evaluation unfair. For example, a model that always outputs "Yes" can still achieve a score above zero in our evaluation. Moreover, the absence of online models with satisfactory performance, makes our benchmarks more suitable for future advancements. We hope our intensive work and intuitive ideas can guide the development of video understanding models toward real-world online video understanding.

## 10. Licenses

The annotations of our OVO-Bench are provided to the community under CC BY-NC-SA 4.0 license. By downloading our dataset from our website or other sources, the user agrees to adhere to the terms of CC BY-NC-SA 4.0 and licenses of the source datasets. Download links are provided for our self-crawled YouTube videos. Licenses of the source datasets are listed in 2

| Dataset              | License               |
|----------------------|-----------------------|
| QAEgo4D [1]          | N/A                   |
| OpenEQA [30]         | MIT License           |
| STAR [48]            | Apache License 2.0    |
| HiREST [54]          | MIT License           |
| YouCook2 [62]        | MIT License           |
| CrossTask [63]       | BSD 3-Clause License  |
| COIN [42]            | Research Purpose Only |
| Ego4D [14]           | MIT License           |
| THUMOS'14 [20]       | Research Purpose Only |
| THUMOS'15 [13]       | Research Purpose Only |
| Perception Test [36] | CC BY 4.0             |
| MovieNet [17]        | N/A                   |
| E.T.Bench [29]       | CC BY 4.0             |

Table 2. License of source datasets in OVO-Bench.

## 11. Data Examples

We provide more examples extracted from our benchmark. We try to cover different video categories in every task to offer a holistic overview of OVO-Bench.



# [EPM] Episodic Memory

QA-Ego4D

Clue Time: 5:22

Question: Where was the kitchen paper towel before I picked it?  
Options: A. **top of the kitchen sink**; B. under the sink;  
C. on the counter; D. on the stove

Clue Time: 3:44

Question: What did I pick from the fridge?  
Options: A. bread; B. milk; **C. vegetable**; D. water

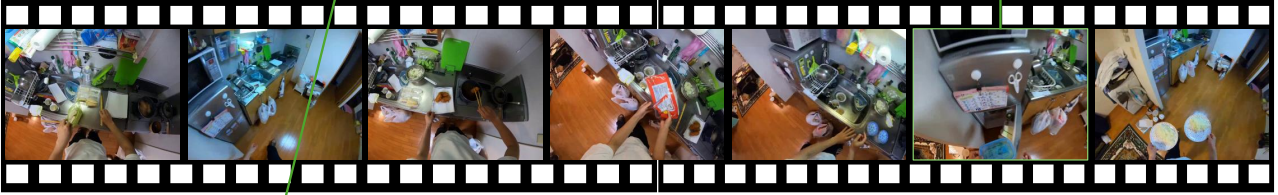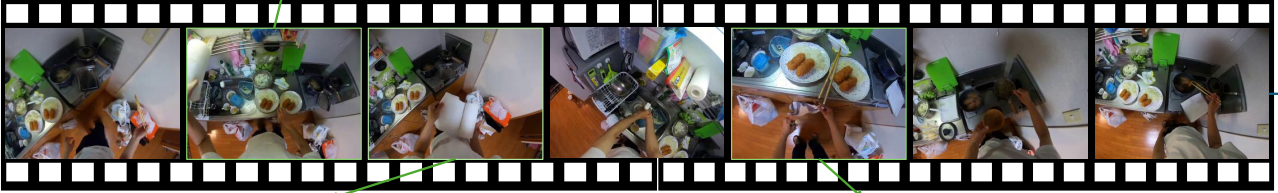

Clue Time: 5:25

Question: How many rolls of paper towel did I cut?  
Options: A. two; **B. one**; C. three; D. four

Clue Time: 6:36

Question: Did I leave the drawer open?  
Options: A. yes; **B. no**

Query At the End

Clue Time: 1:59

Question: Where was the paper towel before I picked it?  
Options: A. on the counter; B. on the cupboard;  
**C. on the table**; D. in the dish washer

Clue Time: 3:05

Question: What drawer did I pull?  
Options: **A. dish washer**; B. microwave;  
C. cupboard; D. fridge

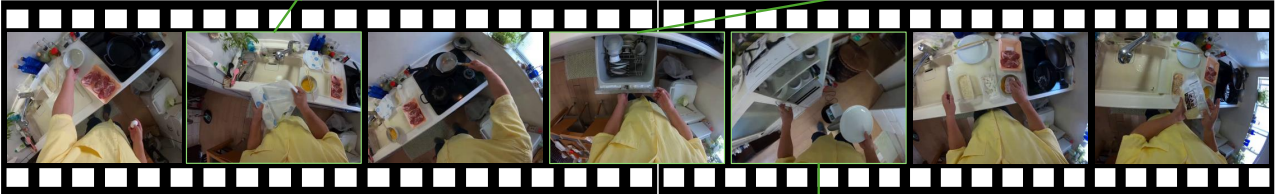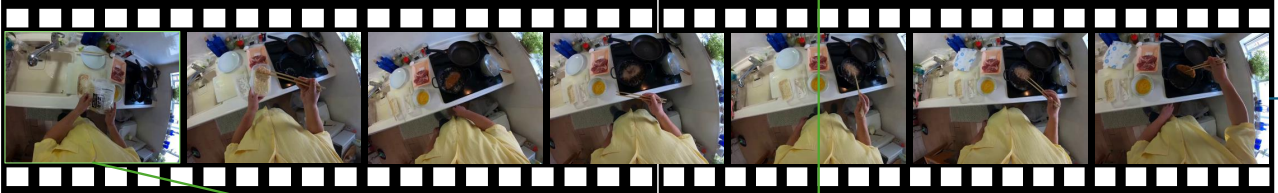

Clue Time: 4:09

Question: What did I pour in the container?  
Options: A. flour; **B. bread crumbs**; C. salt; D. pepper

Clue Time: 3:13

Question: Where was the plate before I picked it?  
Options: A. on the counter; **B. on the cupboard**  
C. on the table; D. in the dish washer

Query At the End

Open-EQA

Clue Time: 0:43

Question: What is the gold object on the nightstand?  
Options: A. A painting; B. A mirror;  
**C. A nightlamp**; D. A vase

Clue Time: 0:50

Question: Is this home on the first floor?  
Options: A. Yes, it's on the first floor;  
**B. No, it's on the second floor**;

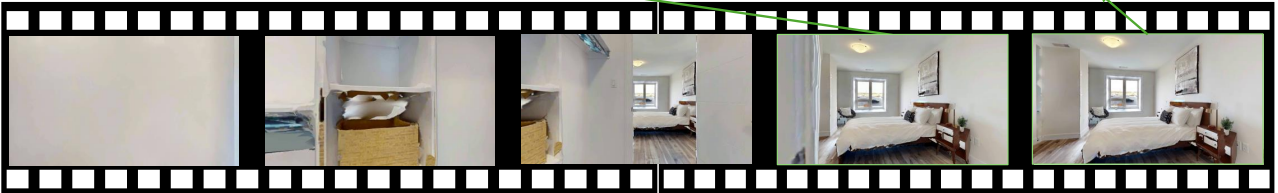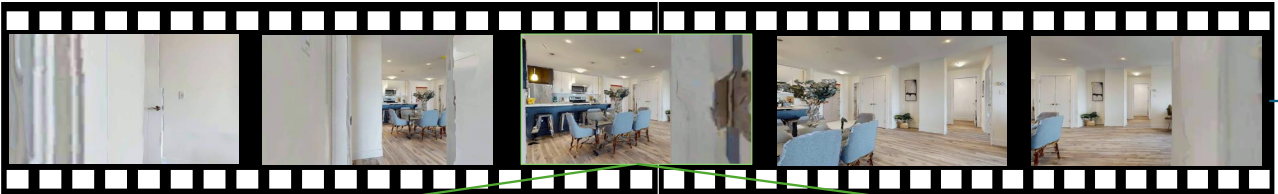

Clue Time: 1:10

Question: Where can I sit and eat if I don't want to use the dining table?  
Options: **A. Use the kitchen bar counter**; B. Use the floor in the hallway;  
C. Use the bed in the bedroom; D. Use the couch in the living room

Clue Time: 1:10

Question: What color is the smoke detector?  
Options: A. White; **B. Yellow or off-white**;  
C. Black; D. Blue

Query At the End

# [HLD] Hallucination Detection

QA-Ego4D

Query Time: 6:11

Question: what did I put in the black dustbin?

Options: A. empty water bottles; B. **Unable to answer**;  
C. old newspapers; D. food scraps

Query Time: 6:44

Question: Where did I put the vacuum cleaner head?

Options: A. closet; B. **Unable to answer**;  
C. bathroom; D. kitchen

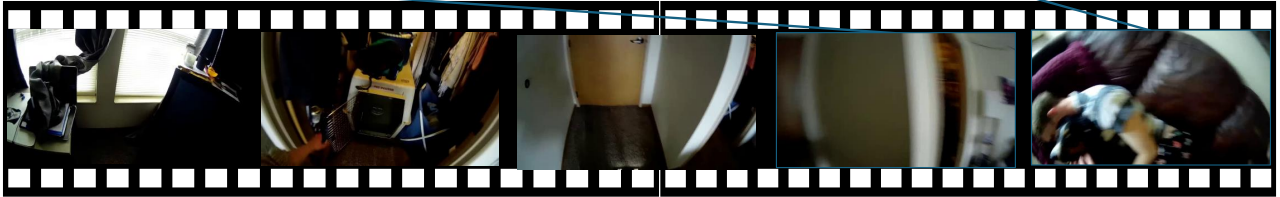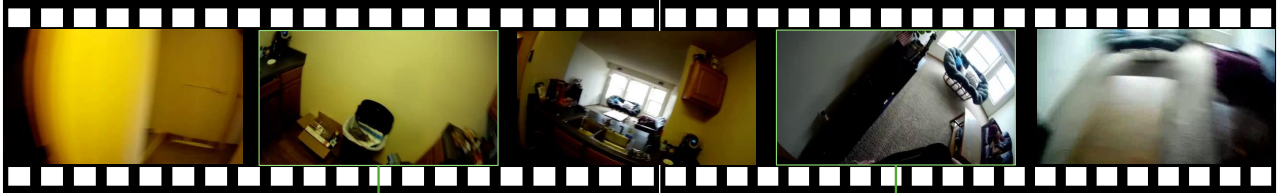

Clue Time: 7:10

Clue Time: 7:30

Query Time: 6:48

Question: Where were game boards?

Options: A. **Unable to answer**; B. in the shelves;  
C. in the fridge; D. in the bags

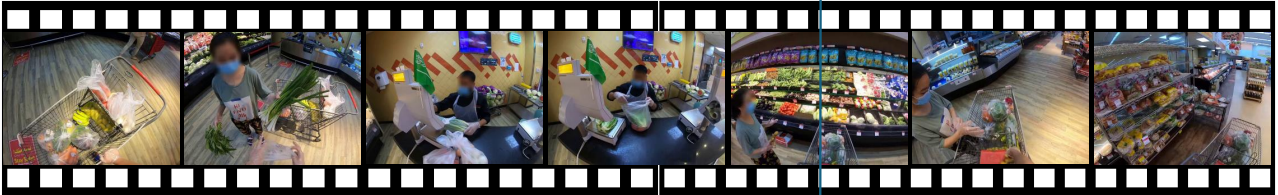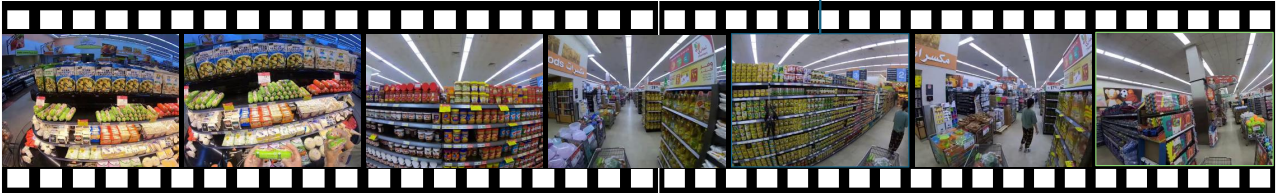

Clue Time: 7:55

Open-EQA

Query Time: 0:35

Question: what color is the flower in the bottom floor?

Options: A. Red; B. **Unable to answer**;  
C. Blue; D. White

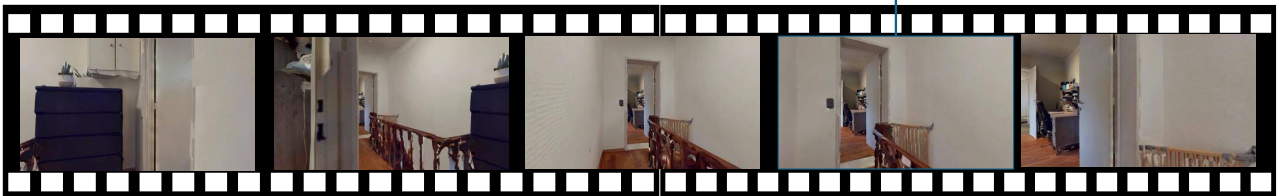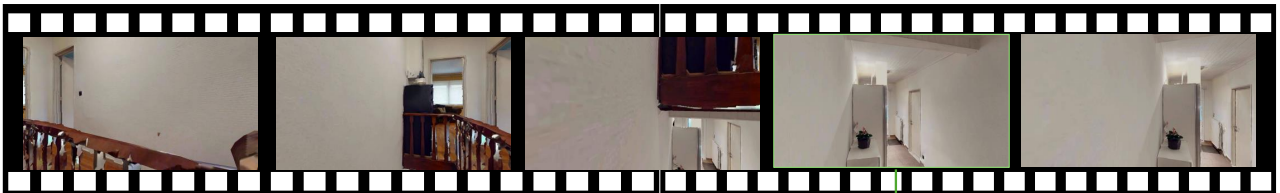

Clue Time: 1:15



# [ASI] Action Sequential Identification

STAR

Clue Time: 0:02

Reference Time: 0:10

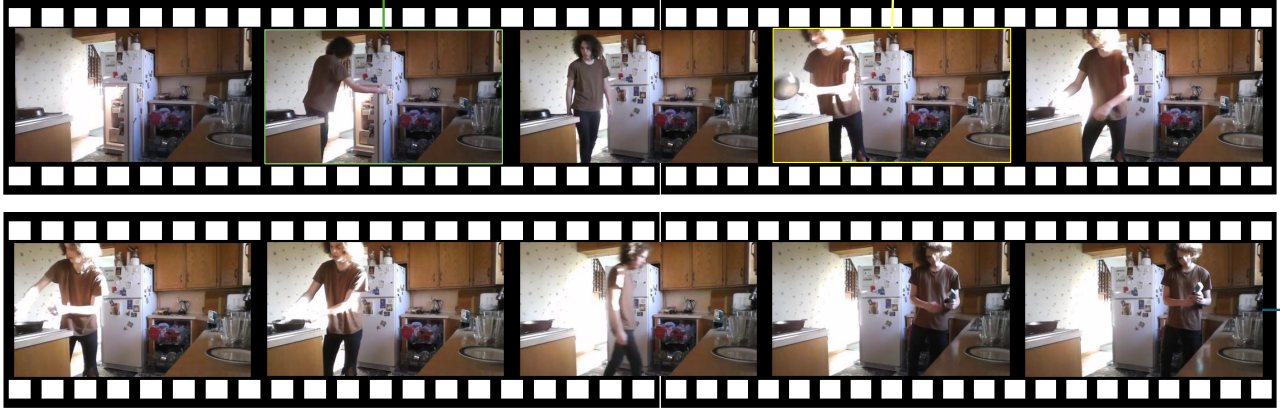

Query Time: 0:27/End of the video

Question: What happened before the person took the pot?

Options: A. **close the refrigerator;** B. Unable to answer;  
C. Took the box.; D. Throw the broom.; E. Open the book.

Reference Time: 0:10

Clue Time: 0:02

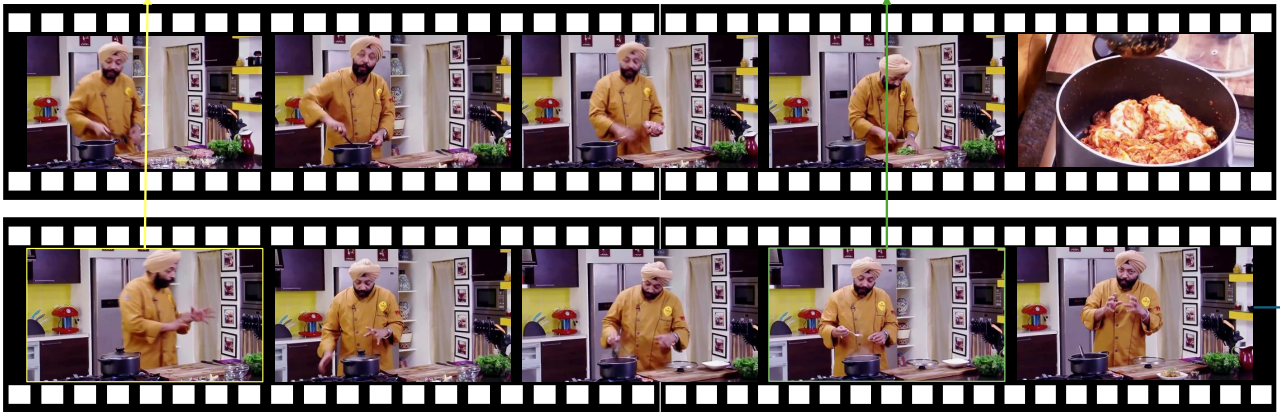

Query Time: 11:46/End of the video

Question: What does the person do after cover up and cook for 6 to 8 minutes?

Options: A. chop up the tomatoes.; B. chop up oleander;  
C. **add more garam masala powder;** D. add cloves to the pot

YouCook2

Clue Time: 0:02

Reference Time: 0:10

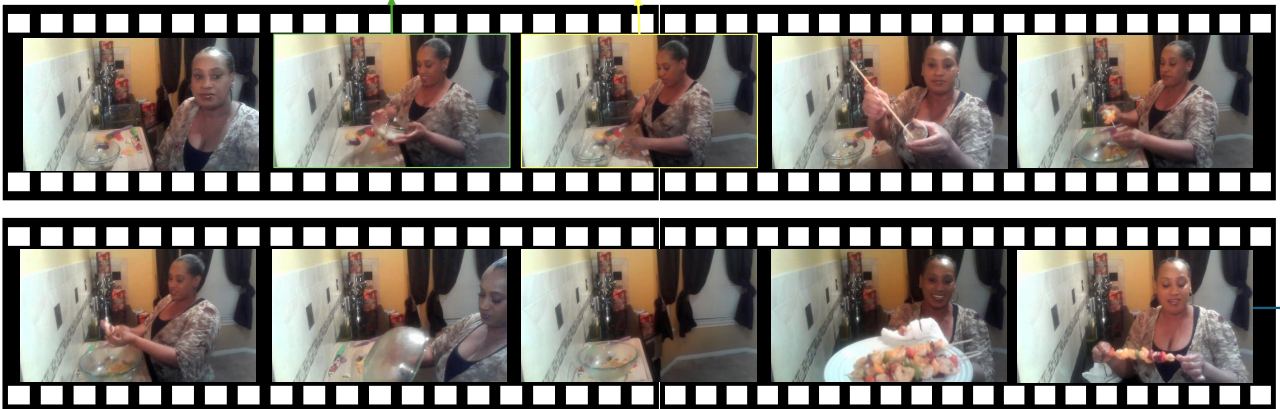

Query Time: 9:03/End of the video

Question: What does the person do before roughly chop garlic and peppers and add them to the bowl?

Options: A. pour some olive oil on the kabob.; B. **pour olive oil on shrimp;**  
C. cut up some onions and peppers into squares.; D. skewer the vegetables and shrimps

# [ASI] Action Sequential Identification

CrossTask

Clue Time: 6:40

Reference Time: 5:00

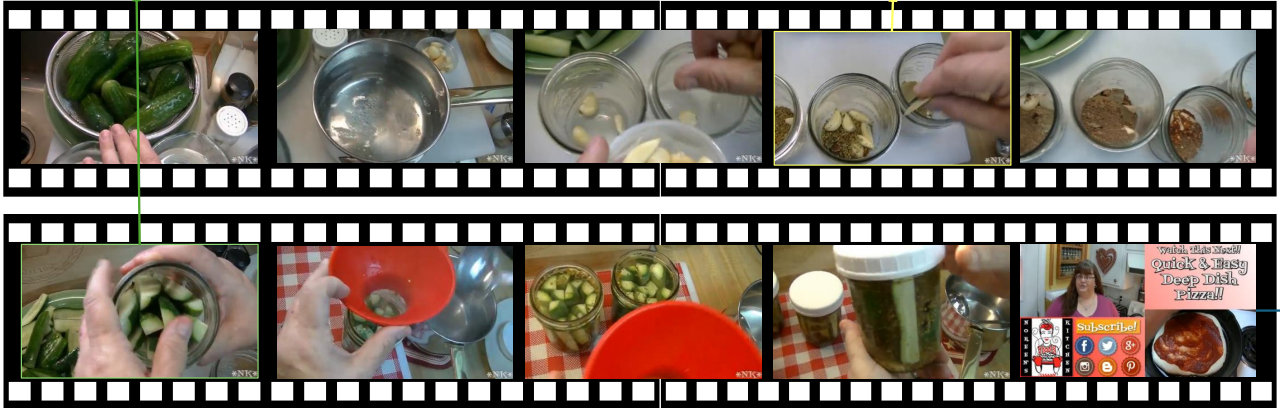

Query Time: 9:34/End of the video

Question: What does the person do after add spices?

Options: A. **pack cucumbers in jar.**; B. add sugar;  
C. pour water.; D. add salt

HiREST

Reference Time: 3:38

Clue Time: 5:00

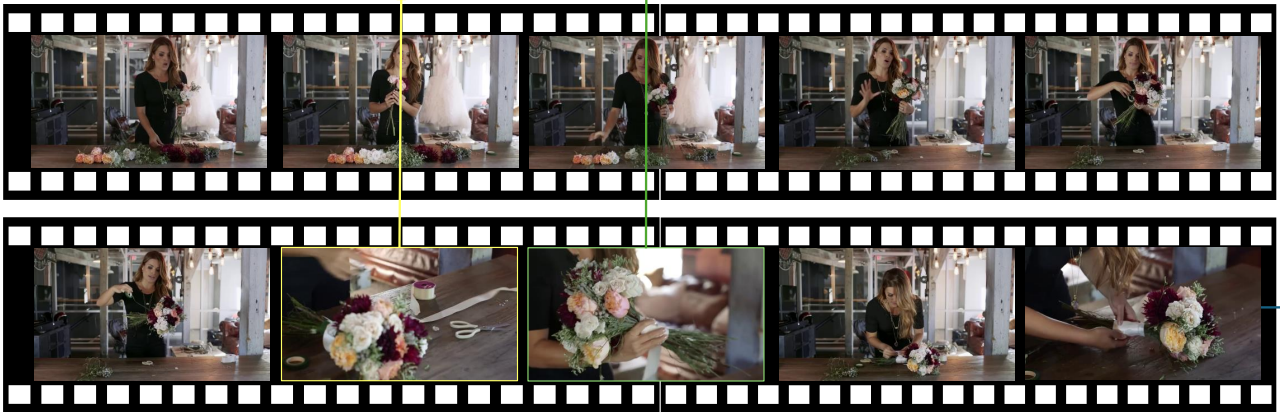

Query Time: 5:54/End of the video

Question: What does the person do after attach pebble piece?

Options: A. attach background piece.; B. merge them.  
C. **sew the edges.**; D. cut the fabric

COIN

Clue Time: 3:00

Reference Time: 1:48

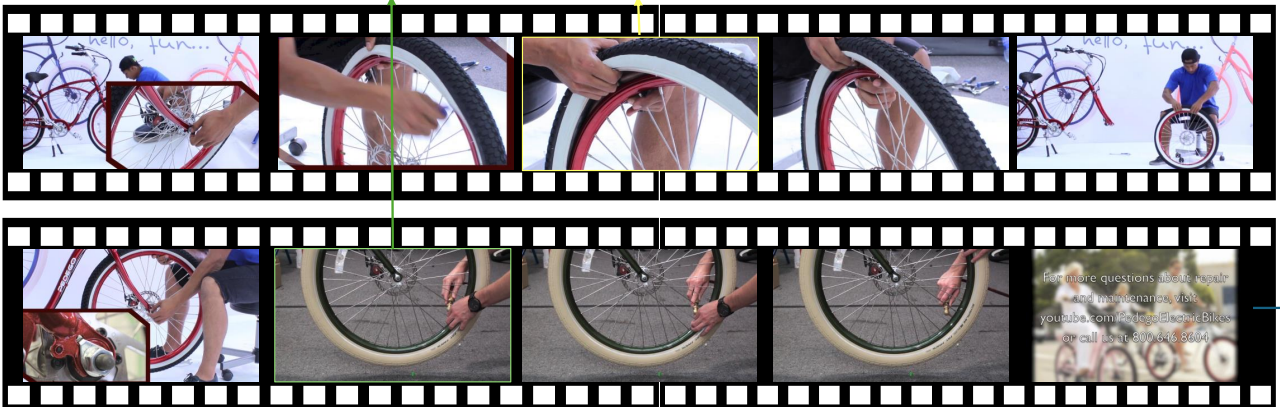

Query Time: 3:50/End of the video

Question: What does the person do after load the wheel?

Options: A. **pump up the tire.**; B. upload the wheel.;  
C. load the tire.; D. load the inner tube



# [STU] Spatial Understanding

Ego4D

Query Time/Clue Time: 1:27

Question: What is the relative position of the person to the car ?

- Options: A. The person is standing at the front of the car.;  
 B. The person is on the co-pilot side of the car.;  
**C. The person is standing beside the driver's side of the car ;**  
 D. The person is behind the trunk of the car.

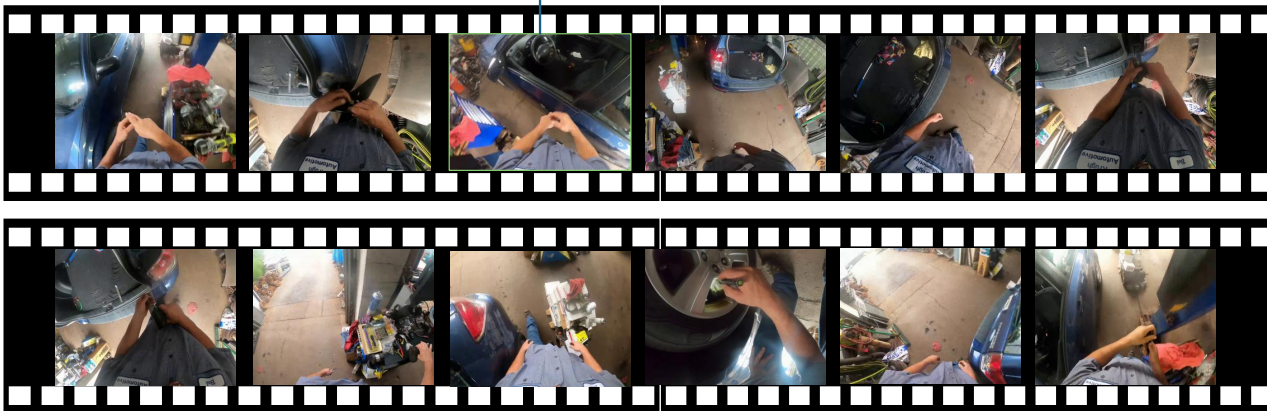

YouTube

Query Time/Clue Time: 1:47

Question: Which container is located closer to the top left corner of the table?

- Options: A. The blue container;  
**B. The white container;**  
 C. The red container;  
 D. The green container.

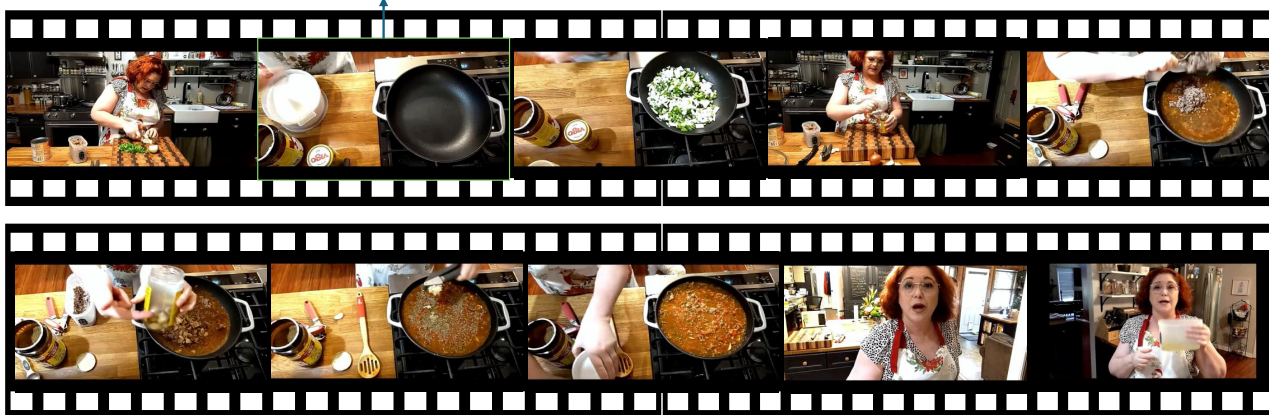

YouTube-Human Annotated

Query Time/Clue Time: 0:12

Question: Which road did I take?

- Options: **A. The road on the right;**  
 B. The road on the left;  
 C. Unable to answer.

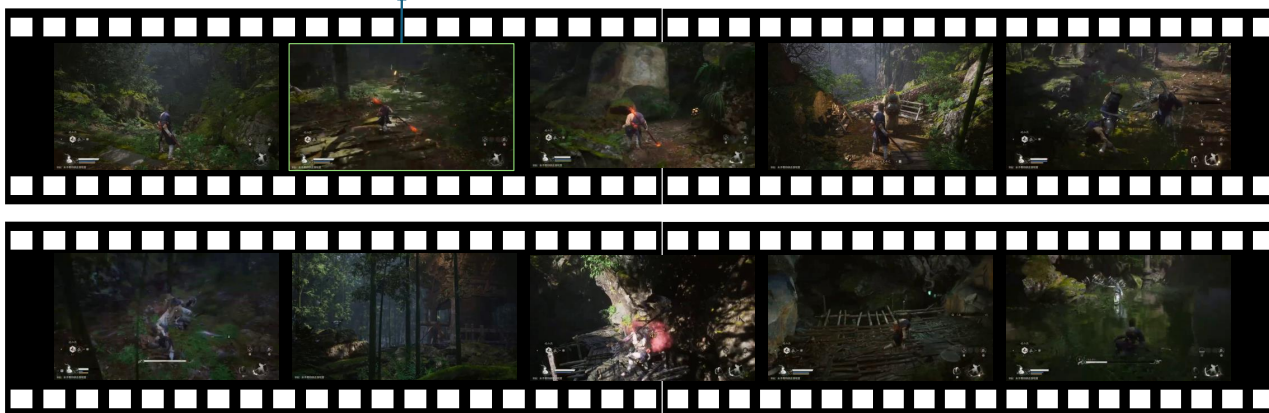

# [OJR] Object Recognition

Ego4D

Query Time/Clue Time: 2:08

Question: What object is being used to construct the paper aircraft wing?

Options: A. A plastic frame;  
B. A wooden stick.;  
C. A paper sheet;  
D. A metal rod.

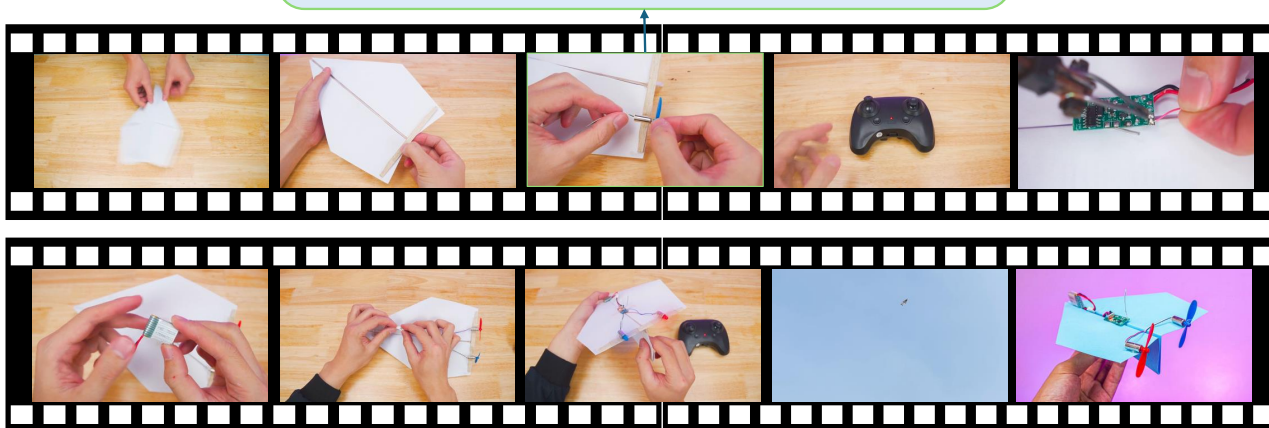

YouTube

Query Time/Clue Time: 1:27

Question: What object is being attached to the back of it?

Options: A. A bag.;  
B. A saddlebag.;  
C. A basket;  
D. A pannier.

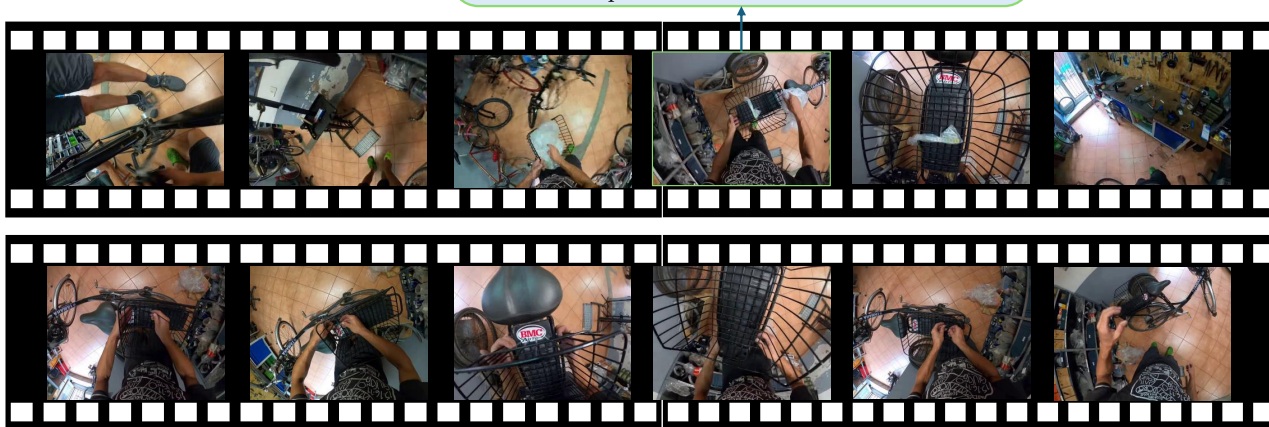

YouTube-Human Annotated

Query Time/Clue Time: 4:28

Question: What weapon do I have in my hand?

Options: A. Bow; B. Sword;  
C. Unable to answer.  
D. Axe. E. Spear

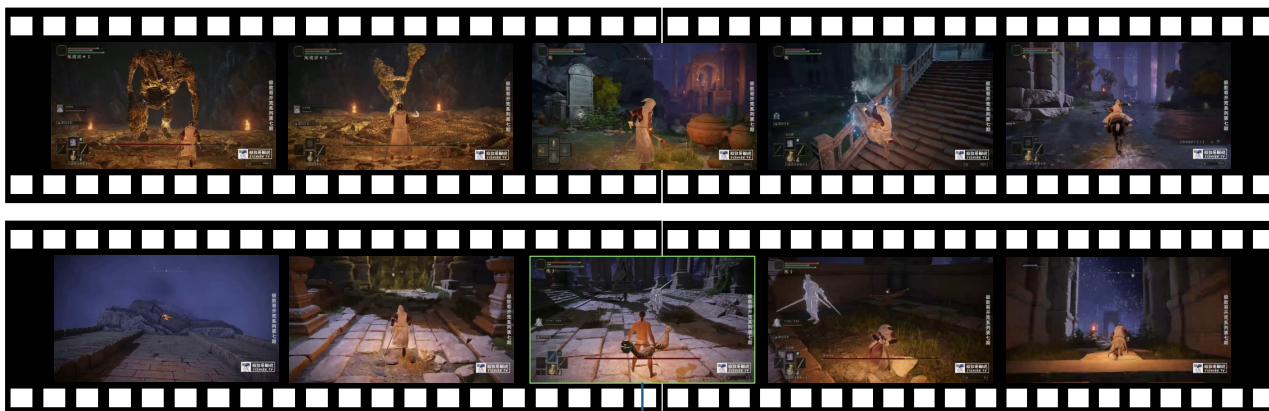



# [ATR] Attribute Recognition

Ego4D

Query Time/Clue Time: 1:33

Question: What is the material of the object being cleaned?

Options: A. Plastic;  
B. **Metal**;  
C. Wood ;  
D. Glass.

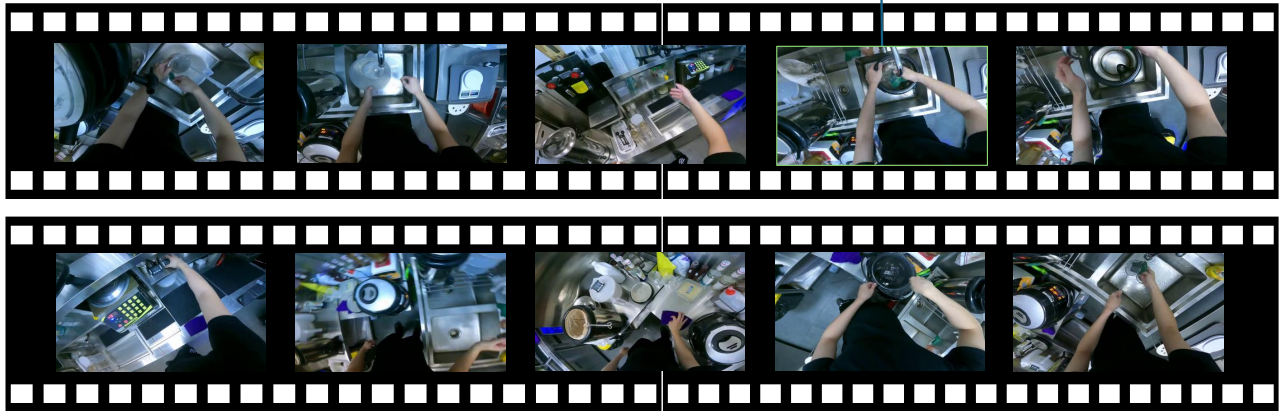

YouTube

Query Time/Clue Time: 1:47

Question: What is notable about the man's tie ?

Options: A. **The man's tie is yellow and textured;**  
B. The man's tie has a geometric pattern.;  
C. The man's tie is purple and striped;  
D. The man's tie features cartoon characters.

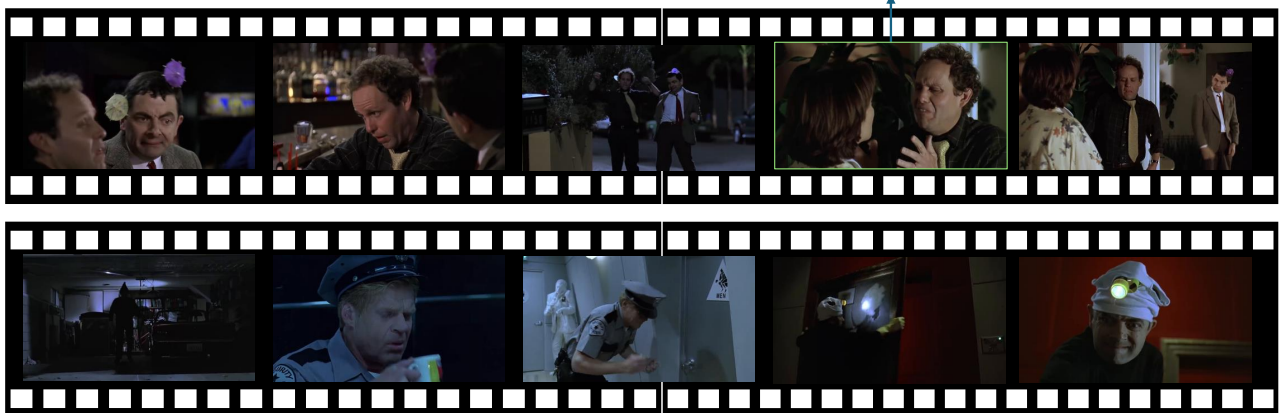

YouTube-Human Annotated

Query Time/Clue Time: 9:20

Question: What is the color of the monsters' clothes?

Options: A. **Red**; B. Blue;  
C. Yellow. D. Green

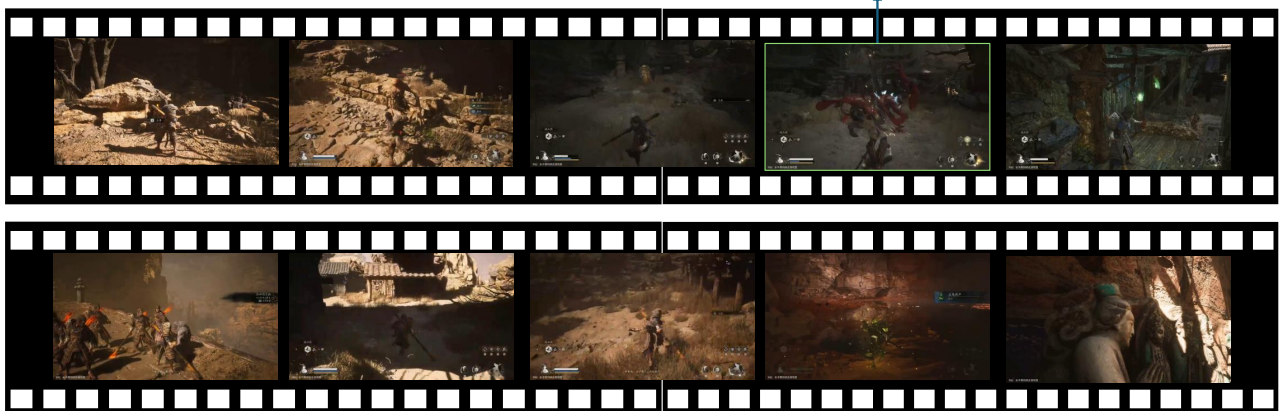



# [ACR] Action Recognition

Ego4D

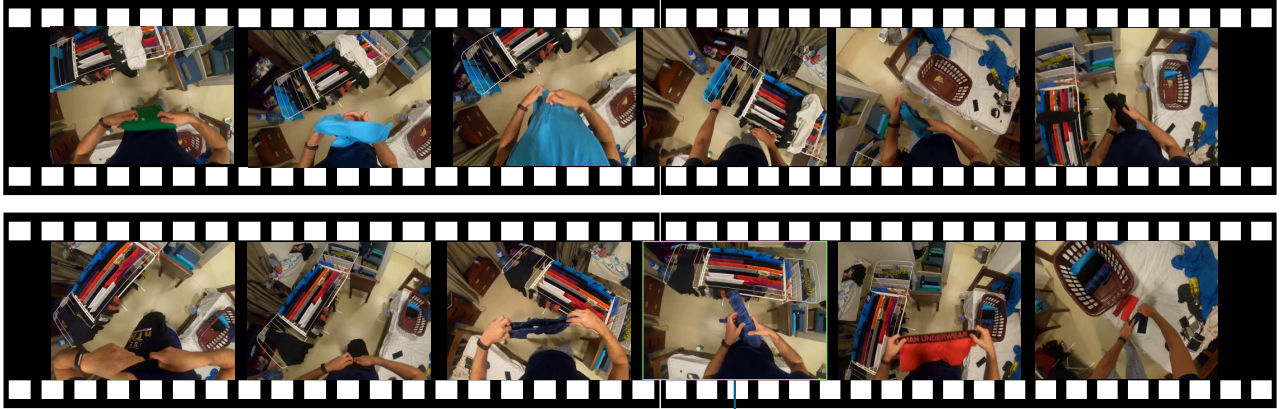

Query Time/Clue Time: 4:18

Question: What action is he performing with the blue checkered cloth?

- Options: A. He is wiping the tabletop with the cloth.;  
B. He is folding the cloth.;  
C. He is covering a basket with the cloth;  
D. He is tying the cloth around his neck.

Query Time/Clue Time: 1:03

Question: What is he doing?

- Options: A. He is playing a musical instrument.;  
B. He is taking off his clothes.;  
C. He is taking a shower;  
D. He is answering the phone.

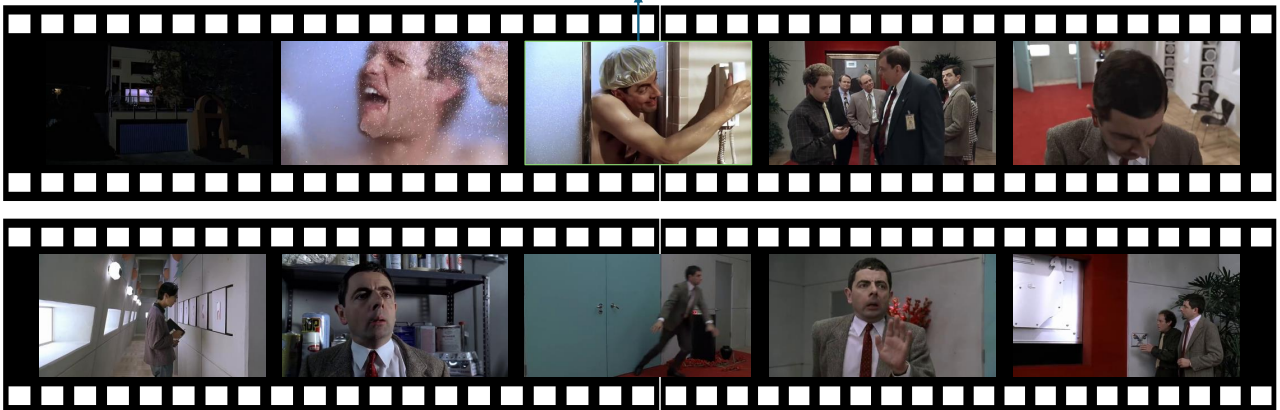

YouTube

Query Time/Clue Time: 2:37

Question: What is she doing with the chicken in her hands?

- Options: A. She is placing the chicken into a pot of water.;  
B. She is putting the chicken down.;  
C. She is holding the chicken while preparing to cook it.;  
D. She is cutting the chicken into smaller pieces..

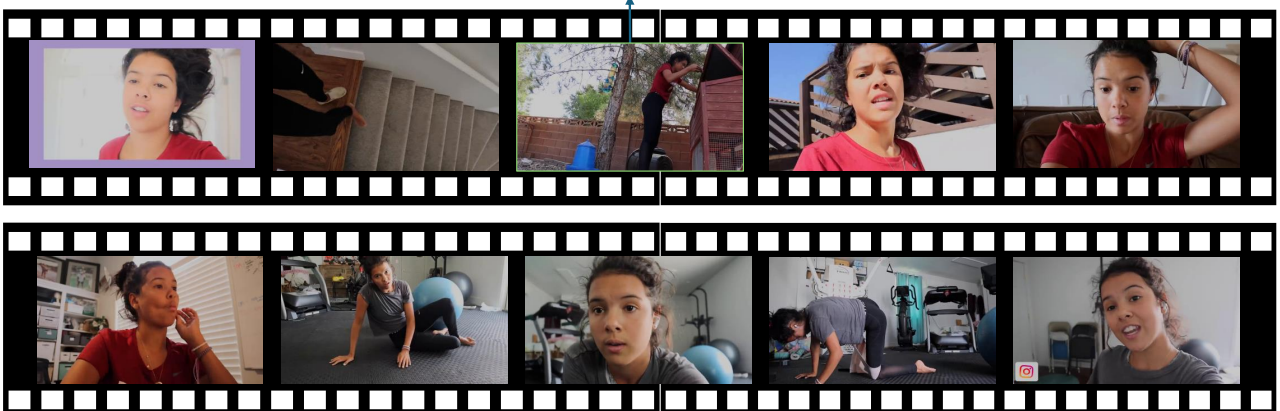

# [OCR] Optical Character Recognition

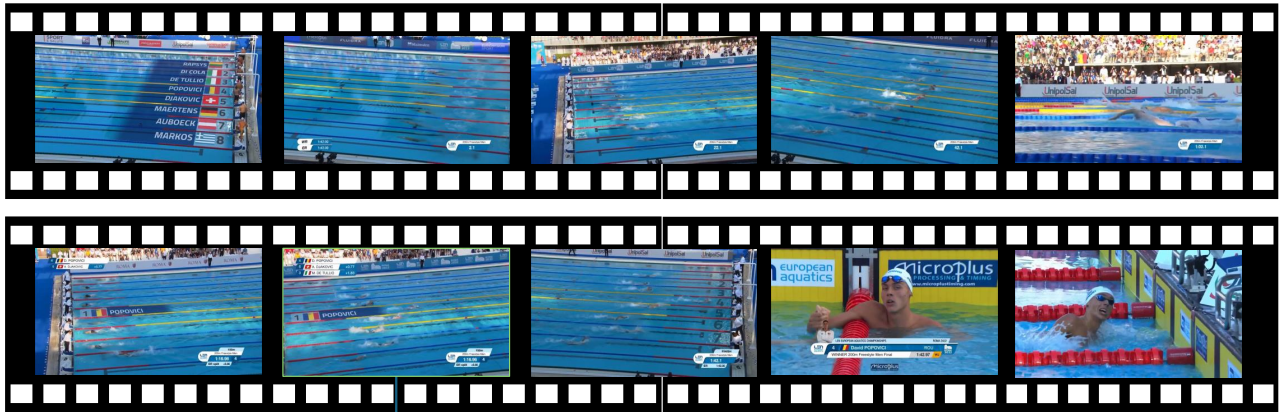

Query Time/Clue Time: 2:16

Question: What is the leading player's time at the 150m mark?

Options: A. **1:16.96** B. 1:15.89;  
C. 1:14.32. D. 1:19.01

Query Time/Clue Time: 0:23

Question: What is the text on the package?

Options: A. **ANDOUILLE;**  
B. THICK CUT HAM;  
C. THICK CUT PORK;  
D. THICK CUT BACON.

Query Time/Clue Time: 1:35

Question: What is the text on the package?

Options: A. ANDOUILLE;  
B. THICK CUT HAM;  
C. THICK CUT PORK;  
D. **THICK CUT BACON.**

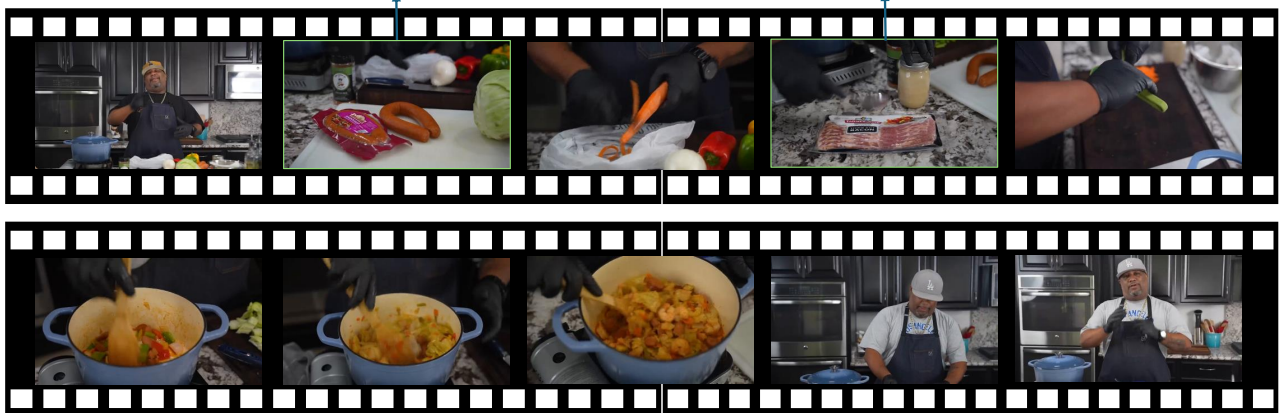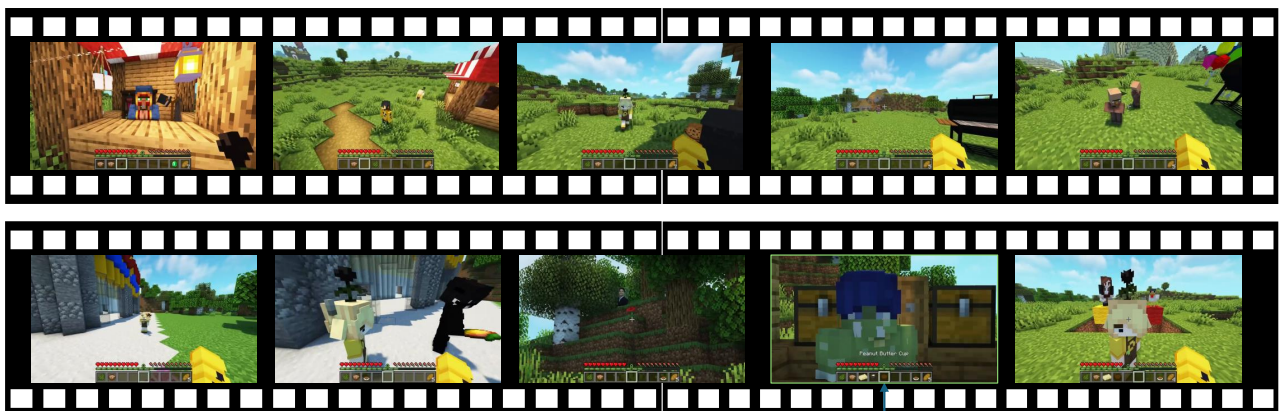

Query Time/Clue Time: 10:12

Question: What text is displayed now?

Options: A. Milk Bucket;  
B. Butter;  
C. **Peanut Butter Cup;**  
D. Peppermint Swirl.



# [FPD] Future Prediction

Ego4D

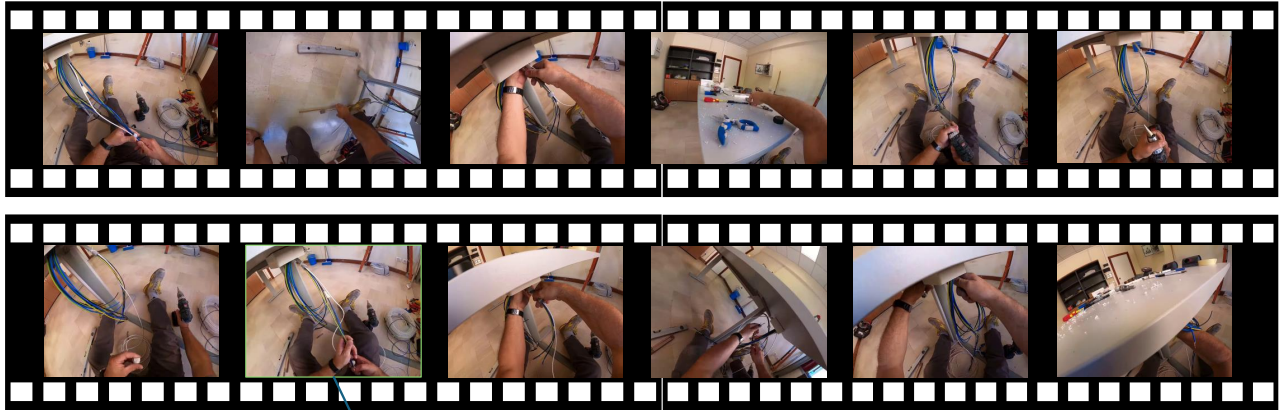

Query Time/Clue Time: 1:45

Question: What is the person preparing to manipulate?

- Options: A. **The person is about to handle or manipulate the wire;**  
B. The person is about to handle or manipulate the plastic tubing;  
C. The person is about to handle or manipulate the circuit board;  
D. The person is about to handle or manipulate the metal sheet

Query Time/Clue Time: 0:59

Question: What action is this person preparing to take ?

- Options: A. **The person is about to turn on the faucet;**  
B. The person is preparing to start the car engine;  
C. The person is about to open the refrigerator door;  
D. The person is reaching for the light switch.

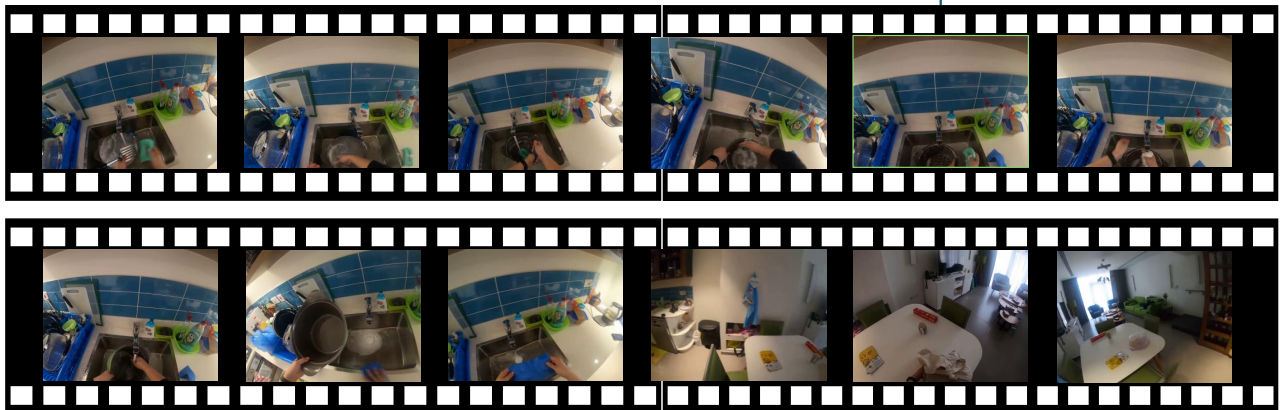

Query Time/Clue Time: 0:59

Question: What is this person about to do?

- Options: A. The person is about to press a button.;  
B. The person is about to grab a book;  
C. **The person is about to open the drawer;**  
D. The person is about to adjust the lamp.

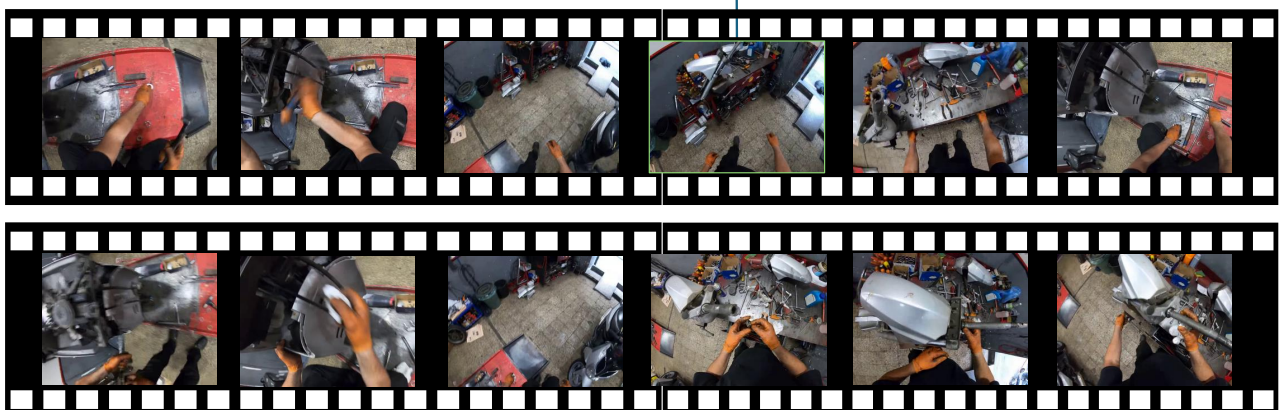



# [REC] Repetition Event Count

Thumos 14/15

Query Time:0.26/1.53/End of the video  
Question: How many times did they clean and jerk?  
Answers: 1/2/2

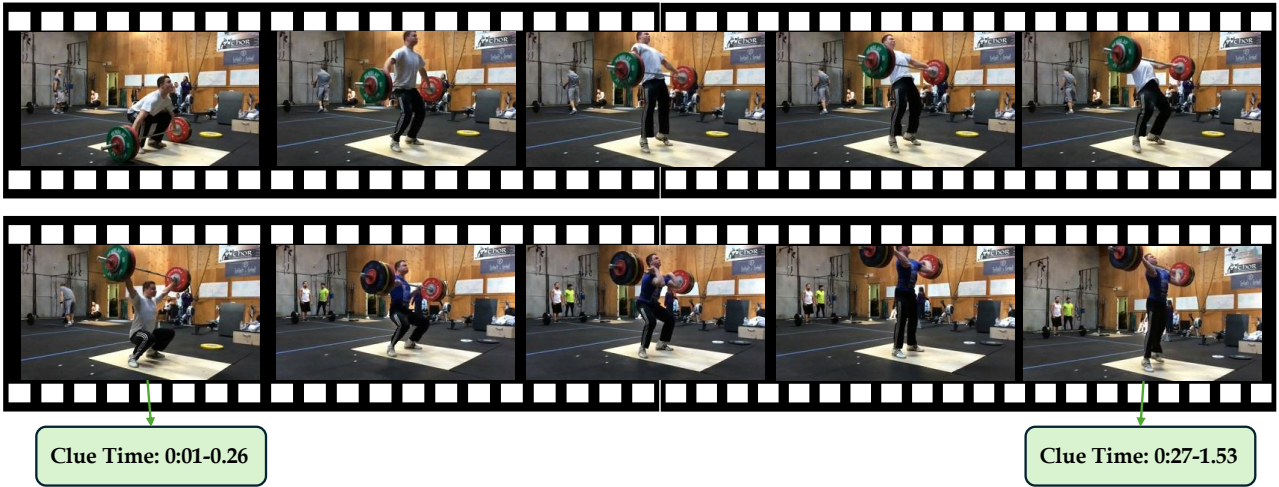

Perception Test

Clue Time: 0:00-0.06

Clue Time: 0:07-0.14

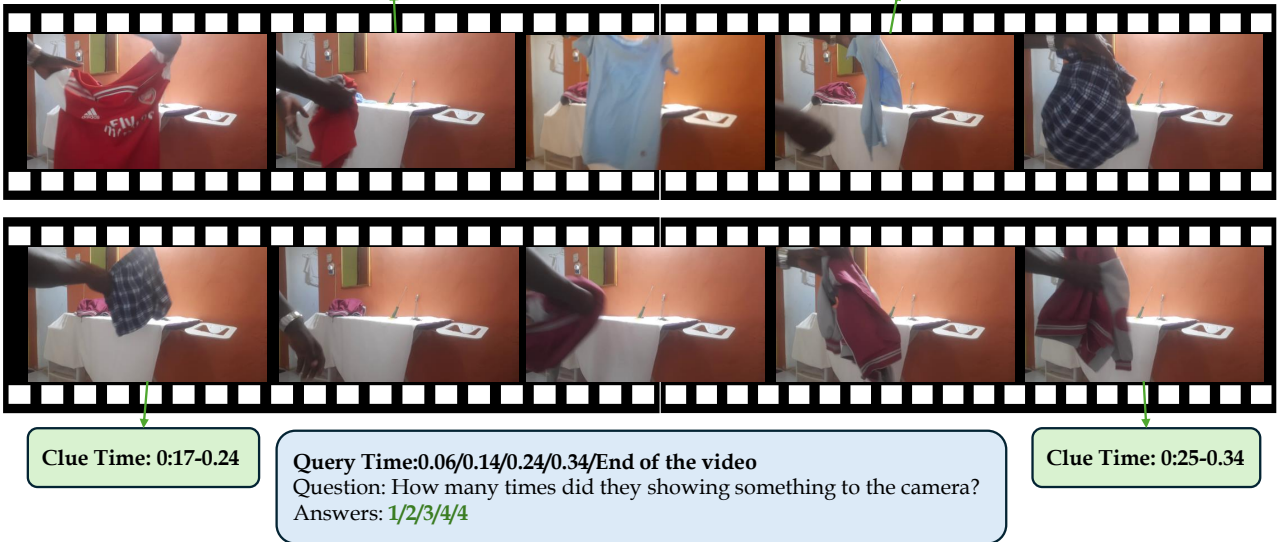

Clue Time: 0:11-0.13

Clue Time: 0:13-0.14

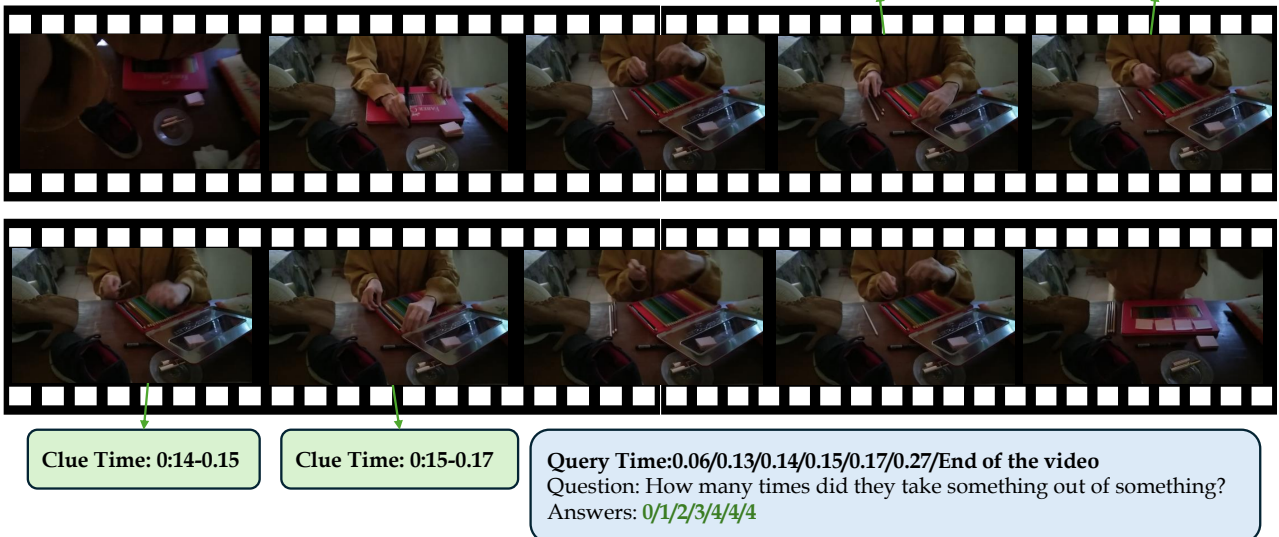

# [SSR] Sequential Steps Recognition

Clue Time: 0:25-0:30

Pull up the hair to reserve place for the hair extensions

Clue Time: 0:31-0:49

put on the hair extensions

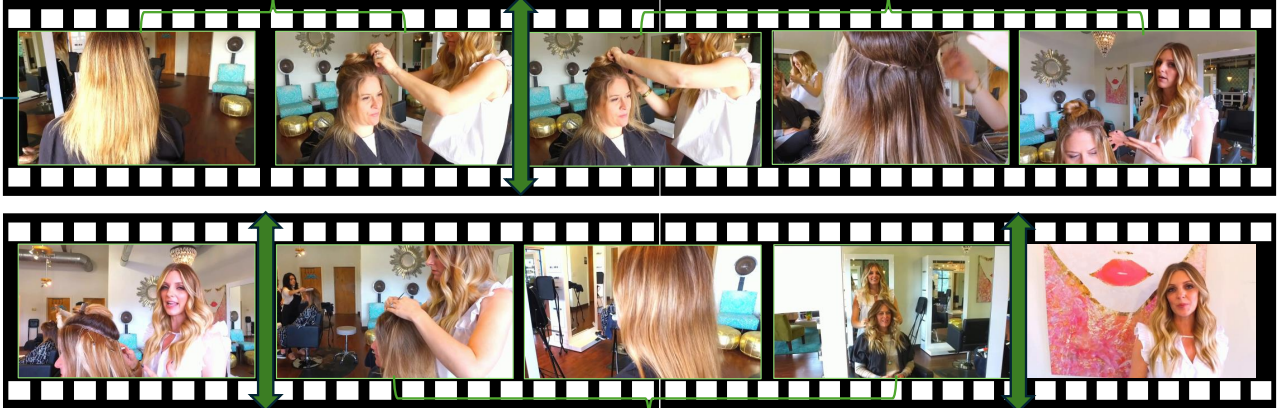

Query Time: Start Of the Video

Question: Illustrate me on how to put on hair extensions according to the video

Clue Time: 1:47-1:57

Put down the hair and comb

COIN

Clue Time: 0:41-0:49

Pour the egg into the bowl

Clue Time: 1:07-1:11

Pour the egg into the pot

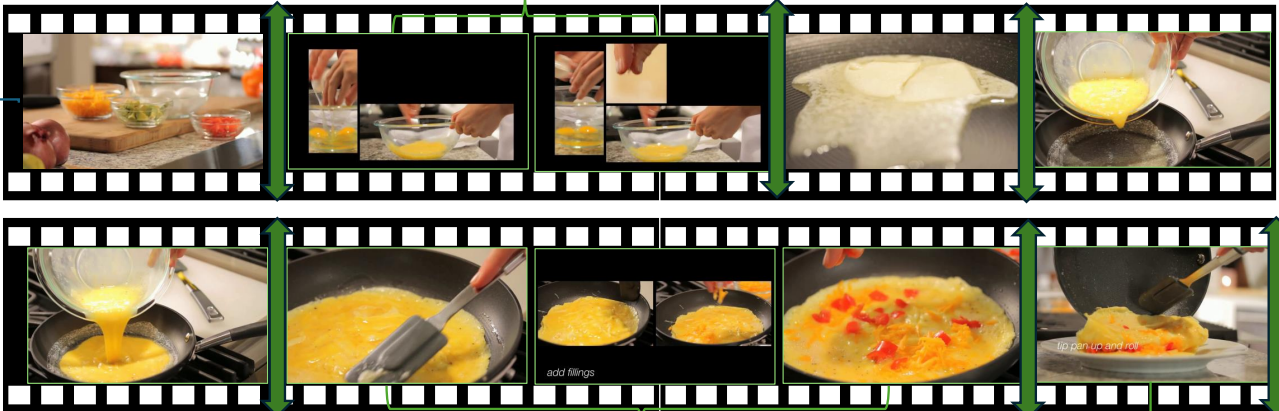

Query Time: Start Of the Video

Question: Illustrate me on how to cook omelet according to the video

Clue Time: 1:12-1:33

Fry eggs

Clue Time: 1:42-1:52

Pour the egg onto the plate

Clue Time: 0:44-1:07

String the fruit together

Clue Time: 1:41-1:46

Melt the sugar

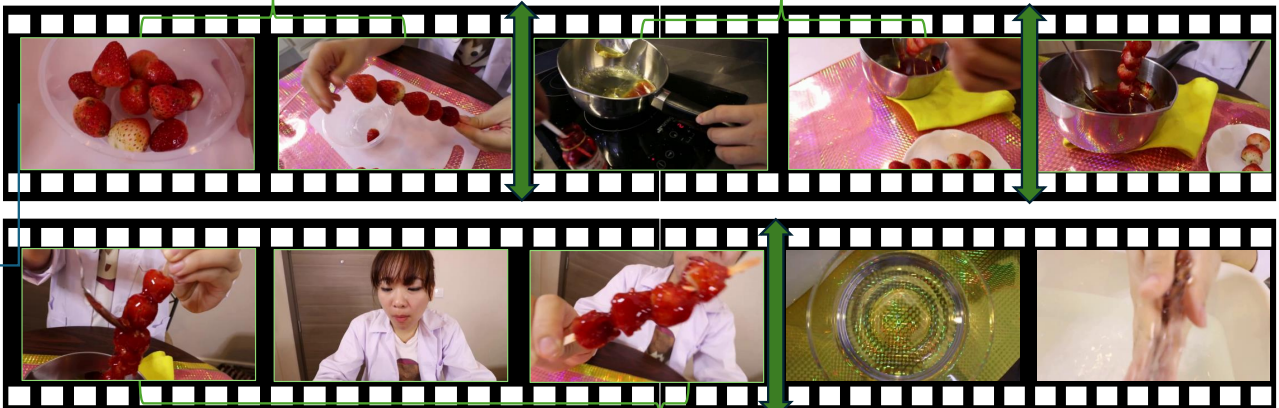

Query Time: Start Of the Video

Question: Illustrate me on how to make sugar coated haws according to the video

Clue Time: 1:51-2:11

Soak sugar gourd in sugar



# [CRR] Clues Reveal Responding

MovieNet

Query Time: 2:25

Question: Women came out of doors of different colors and went into the center door. What is the purpose of doing so?

Clue Time: 3:25

Answer: To listen to the older woman talking

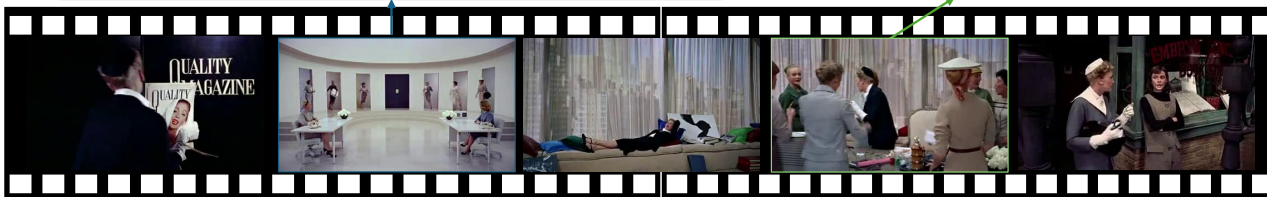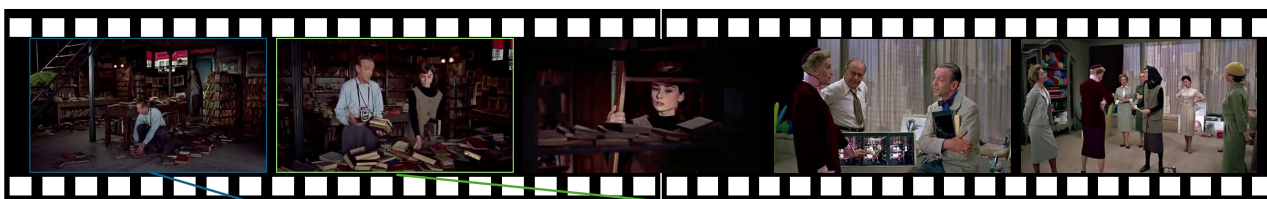

Query Time: 2:25

Question: The man picked up several books from the ground. What does the man do with the books he picked up?

Clue Time: 3:25

Answer: He handed these books to the woman

Query Time: 4:02

Question: A policeman is driving the car away, what is his destination

Clue Time: 5:15

Answer: A residential house with a woman inside.

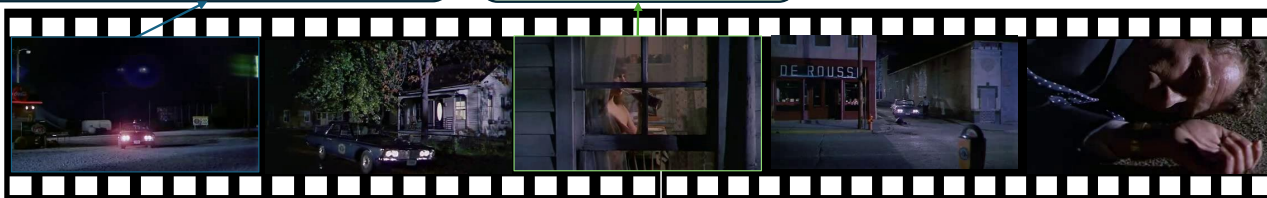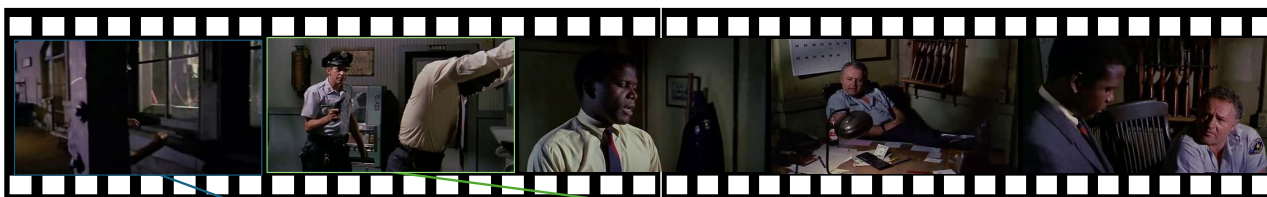

Query Time: 10:19

Question: The policeman is stepping into a wooden house, what does the police see?

Clue Time: 10:26

Answer: A black man sitting on a bench.

Query Time: 3:23

Question: The woman with the gray dress is stepping into the room, what does she do in the room?

Clue Time: 3:27

Answer: She talks to the man

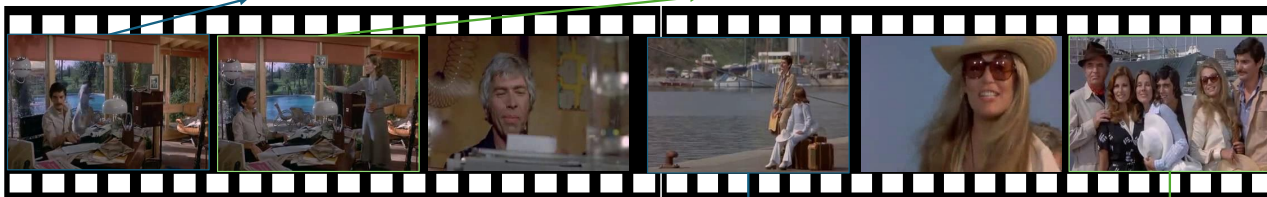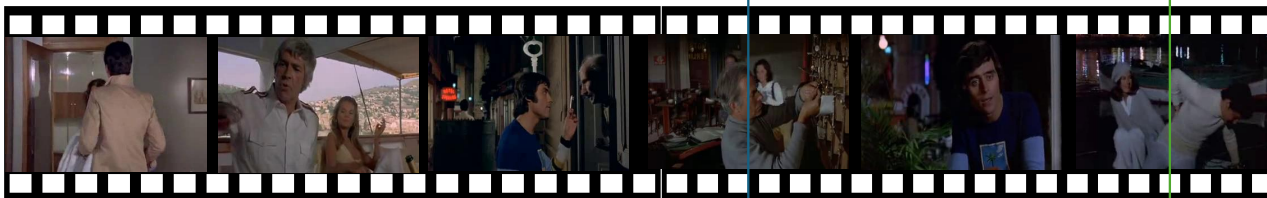

Query Time: 8:07

Question: The couple are sitting on their trunks, who do they meet then

Clue Time: 8:28

Answer: A group of friends
